# Supplementary material for: Student-Reported Classroom Climate Pre and Post Teacher Training in Restorative Practices
Source: Frontiers journal article supplement (doi:10.3389/feduc.2021.719357), 2021-08-19
Supplement: Table_8.DOCX [file Table_8.DOCX]

Descriptive data of primary and secondary outcomes in Study 2

Table 1.

*Primary and secondary outcomes in Study 2 at baseline by trial arm*

|  | control group  *n* = 223 | intervention group  *n* = 178 | overall  *n* = 401 |
| --- | --- | --- | --- |
| **Primary outcomes** |  |  |  |
| LFSK, mean (SD) |  |  |  |
| rigour-control | 20.47 (3.40) | 20.99 (3.70) | 20.70 (3.54) |
| warmth | 34.06 (5.58) | 34.87 (6.16) | 34.42 (5.85) |
| pedagogical engagement | 21.66 (4.66) | 23.89 (4.24) | 22.64 (4.61) |
| restrictiveness | 15.19 (4.78) | 14.21 (4.47) | 14.75 (4.66) |
| injustice | 13.19 (4.79) | 11.93 (4.67) | 12.63 (4.77) |
| community | 20.79 (4.02) | 20.94 (4.20) | 20.85 (4.10) |
| rivalry | 13.41 (17.82) | 14.02 (4.88) | 13.67 (4.64) |
| disruptions | 17.82 (4.15) | 17.20 (4.26) | 17.55 (4.20) |
|  |  |  |  |
| classroom climate | 127.19 (18.42) | 131.57 (17.17) | 129.12 (17.98) |
| relationship amongst students | 43.38 (7.36) | 42.75 (7.77) | 43.10 (7.54) |
| relationship between students and teachers | 65.27 (10.72) | 69.73 (10.08) | 67.26 (10.66) |
|  |  |  |  |
| **Secondary outcomes** |  |  |  |
| PIQ, mean (SD) |  |  |  |
| social inclusion | n.a. | 13.27 (2.45) | 13.27 (2.45) |
| emotional inclusion | n.a. | 12.28 (2.92) | 12.28 (2.92) |
|  |  |  |  |
| R-PEQ, mean (SD) |  |  |  |
| overt victimization | 5.18 (2.54) | 5.61 (2.87) | 5.42 (2.73) |
| relational victimization | 5.16 (2.23) | 5.48 (2.76) | 5.34 (2.54) |
| reputational victimization | 5.43 (2.87) | 6.61 (3.74) | 6.10 (3.42) |
|  |  |  |  |

Table 2.

*Primary and secondary outcomes in Study 2 at post-test by trial arm*

|  | control group  *n* = 180 | intervention group  *n* = 41 | overall  *n* = 221 |
| --- | --- | --- | --- |
| **Primary outcomes** |  |  |  |
| LFSK, mean (SD) |  |  |  |
| rigour-control | 20.87 (3.03) | 20.69 (3.69) | 20.83 (3.17) |
| warmth | 32.75 (5.76) | 35.73 (6.57) | 33.37 (6.05) |
| pedagogical engagement | 21.03 (4.70) | 23.65 (4.15) | 21.57 (4.71) |
| restrictiveness | 15.08 (5.13) | 13.19 (5.23) | 14.69 (5.19) |
| injustice | 13.31 (5.33) | 13.19 (5.23) | 12.81 (5.17) |
| community | 20.56 (5.09) | 21.59 (4.53) | 20.77 (4.99) |
| rivalry | 14.11 (4.63) | 13.02 (4.61) | 13.89 (4.64) |
| disruptions | 17.76 (4.21) | 16.80 (4.59) | 17.56 (4.31) |
|  |  |  |  |
| classroom climate | 126.08 (21.19) | 135.48 (21.48) | 128.10 (21.55) |
| relationship amongst students | 42.45 (8.73) | 44.57 (8.53) | 42.88 (8.71) |
| relationship between students and teachers | 64.88 (12.31) | 70.92 (11.61) | 66.12 (12.39) |
|  |  |  |  |
| **Secondary outcomes** |  |  |  |
| PIQ, mean (SD) |  |  |  |
| social inclusion | n.a. | 12.78 (3.06) | 12.78 (3.06) |
| emotional inclusion | n.a. | 12.50 (3.20) | 12.50 (3.20) |
|  |  |  |  |
| R-PEQ, mean (SD) |  |  |  |
| overt victimization | 4.91 (2.16) | 4.59 (2.01) | 4.82 (2.12) |
| relational victimization | 5.15 (2.55) | 4.78 (2.49) | 5.05 (2.54) |
| reputational victimization | 5.66 (2.99) | 5.24 (2.65) | 5.54 (2.90) |
|  |  |  |  |
